# Supplementary material
Source: publisher figshare collection journal article supplement (https://tandf.figshare.com/articles/dataset/_/6429083)
Supplement: Supplementary file 1 [file 1]

## Supplementary information

### Decomposition of CH<sub>4</sub> hydrate: effects of temperature and salt from molecular simulations

Fengfeng Gao,<sup>abc</sup> Krishna M. Gupta,<sup>c</sup> Shiling Yuan<sup>b\*</sup> and Jianwen Jiang<sup>c\*</sup>

<sup>a</sup> Department of Chemical Engineering, Zibo Vocational Institute, Zibo 255314, China

<sup>b</sup> Key Laboratory of Colloid and Interface Chemistry, Shandong University, Jinan 250100, China

<sup>c</sup> Department of Chemical and Biomolecular Engineering, National University of Singapore, 117576, Singapore

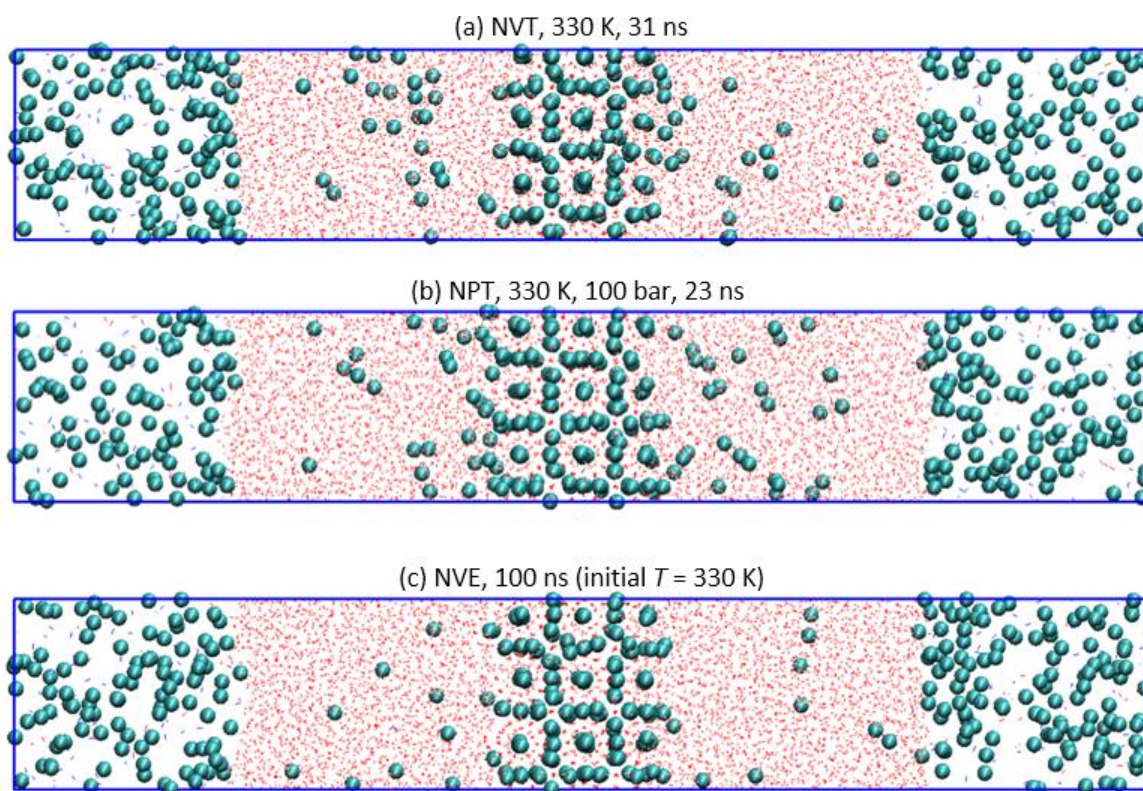

**Figure S1.** Simulation snapshots in three ensembles (NVT, NPT and NVE).

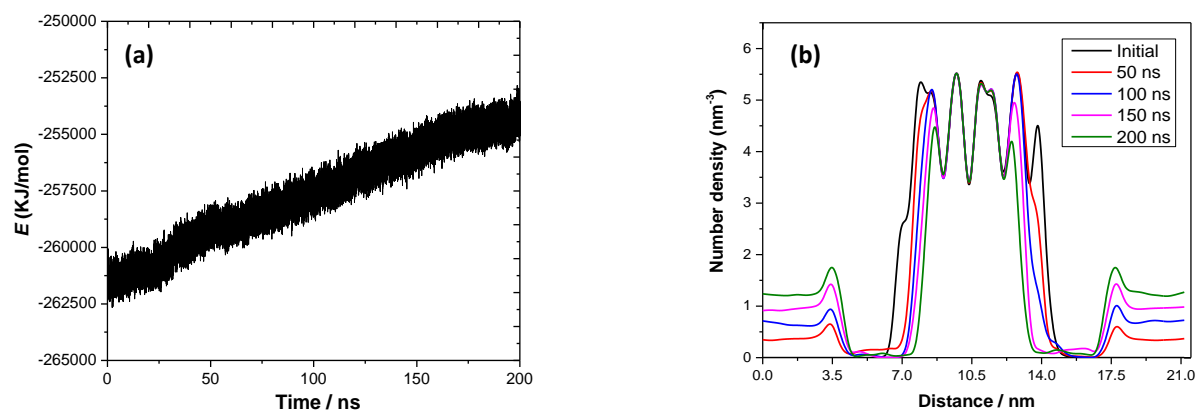

**Figure S2.** Decomposition at 300 K (a) potential energy (b) density profiles of CH<sub>4</sub> along the  $x$ -axis.

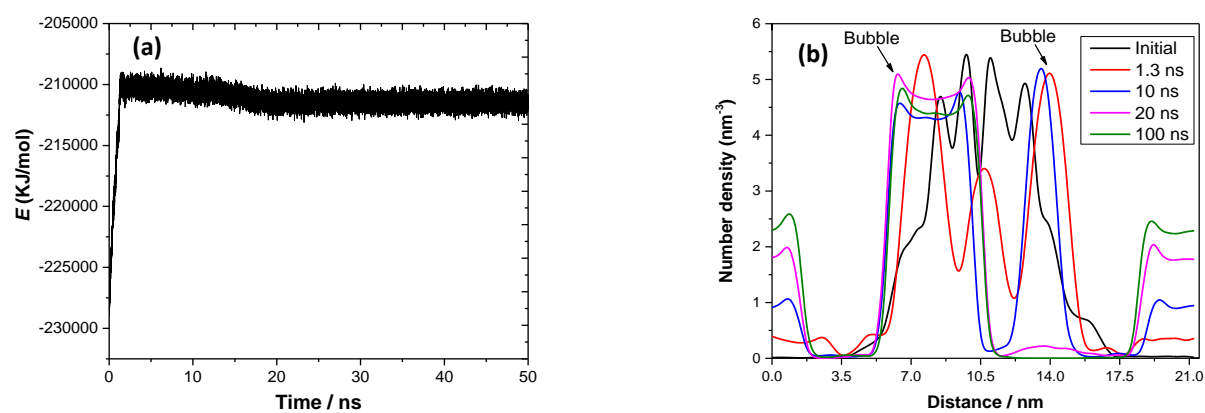

**Figure S3.** Decomposition at 360 K (a) potential energy (b) density profiles of CH<sub>4</sub> along the  $x$ -axis.

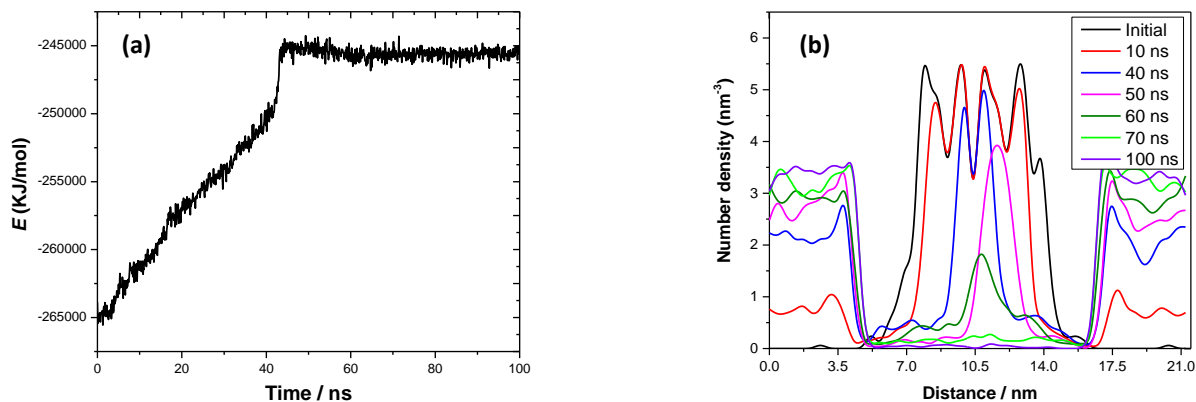

**Figure S4.** Decomposition at 330 K with 0.6 M NaCl (a) potential energy (b) density profiles of CH<sub>4</sub> along the  $x$ -axis.

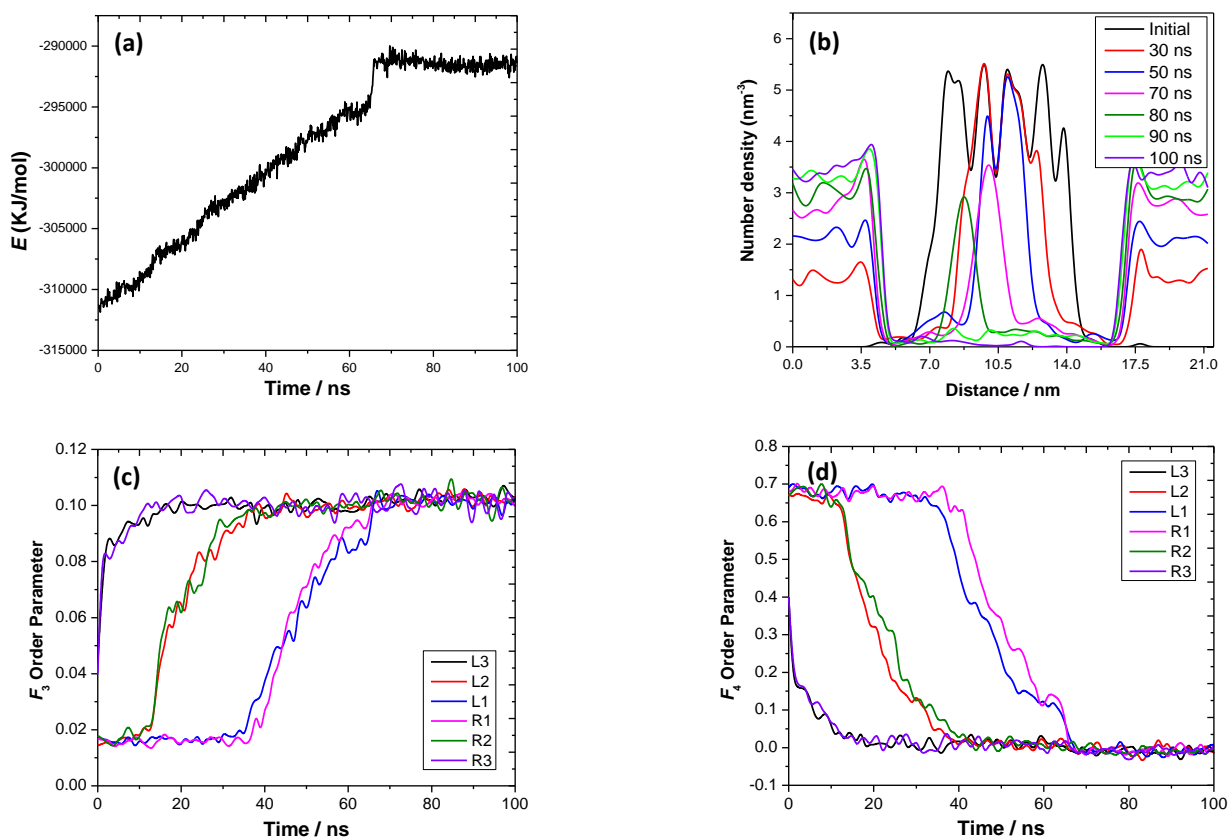

**Figure S5.** Decomposition at 330 K with 1.8 M NaCl (a) potential energy (b) density profiles of CH<sub>4</sub> along the  $x$ -axis (c)  $F_3$  and (d)  $F_4$  parameters in different layers.

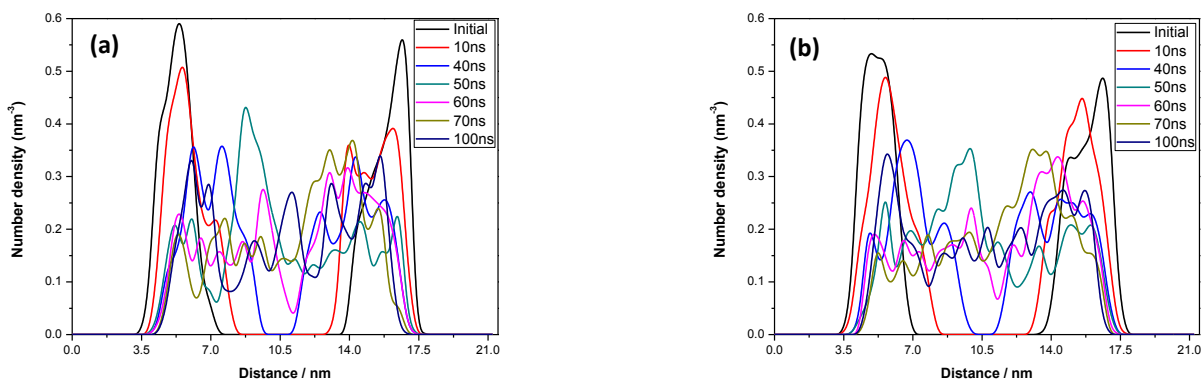

**Figure S6.** Density profiles of (a) Na<sup>+</sup> and (b) Cl<sup>-</sup> along the  $x$ -axis at 330 K with 0.6 M NaCl.

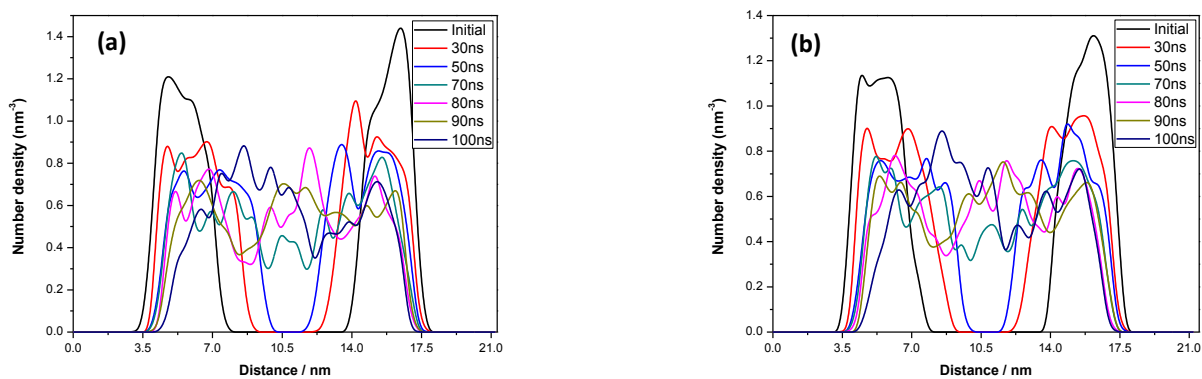

**Figure S7.** Density profiles of (a) Na<sup>+</sup> and (b) Cl<sup>-</sup> along the  $x$ -axis at 330 K with 1.8 M NaCl.

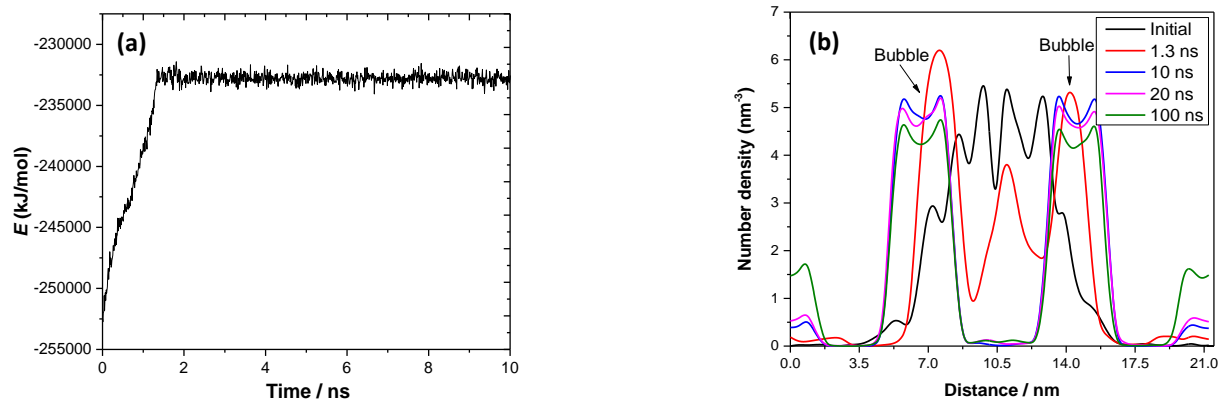

**Figure S8.** Decomposition at 360 K with 0.6 M NaCl (a) potential energy (b) density profiles of CH<sub>4</sub> along the  $x$ -axis.

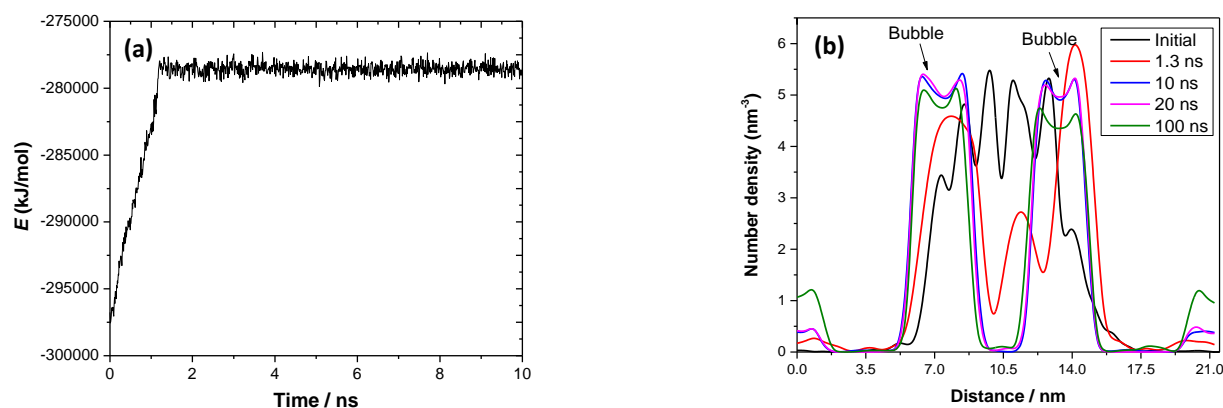

**Figure S9.** Decomposition at 360 K with 1.8 M NaCl (a) potential energy (b) density profiles of CH<sub>4</sub> along the  $x$ -axis.
